# Supplementary material for: A global microRNA screen identifies regulators of the ErbB receptor signaling network
Source: PubMed Central journal article supplement (PMC4314810; doi:10.1186/s12964-015-0084-z), 2015-01-29

**Figure S1**

**A**

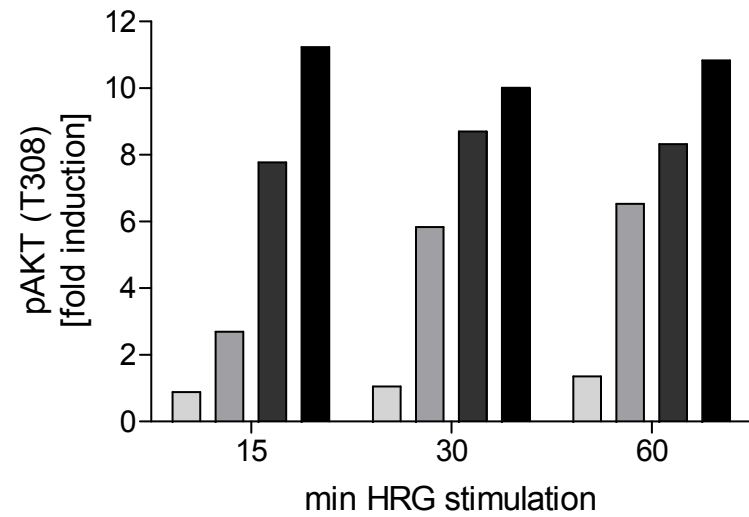

**B**

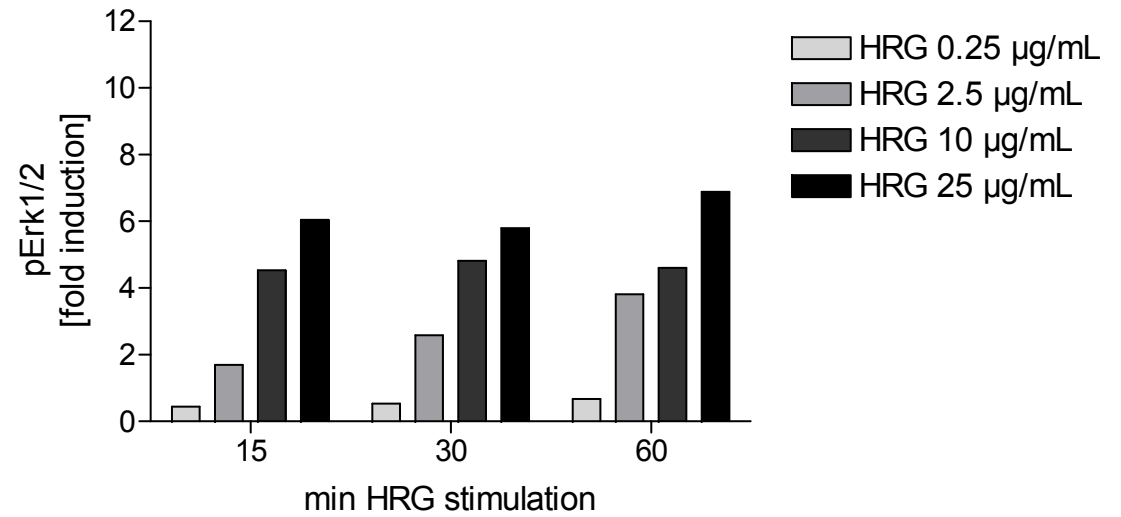

Figure S2

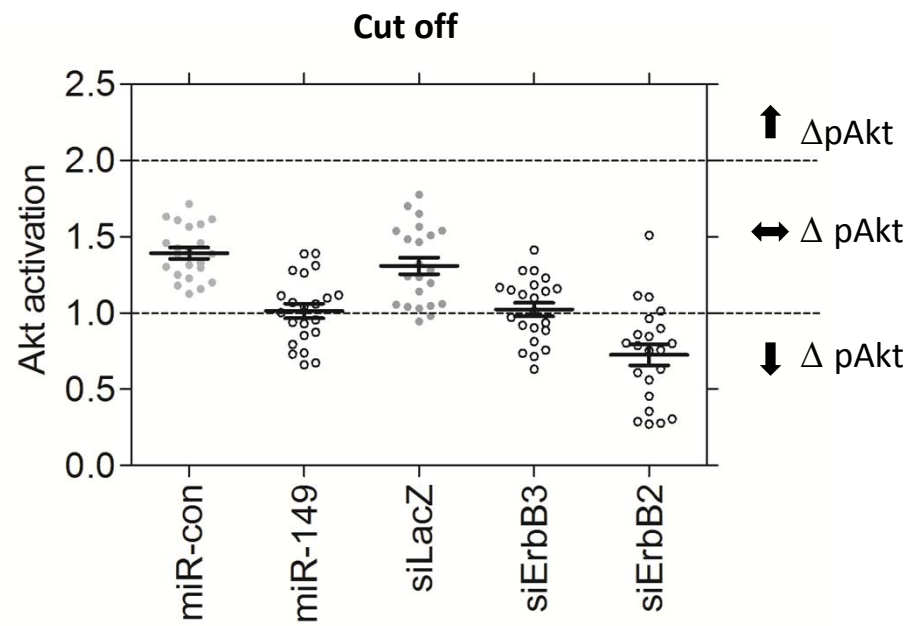

| Bonferroni's Multiple Comparison Test |     |
|---------------------------------------|-----|
| miR-con vs miR-149                    | *** |
| miR-con vs siLacZ                     | ns  |
| miR-con vs siErbB3                    | *** |
| miR-con vs siErbB2                    | *** |
| miR-149 vs siLacZ                     | *** |
| miR-149 vs siErbB3                    | ns  |
| miR-149 vs siErbB2                    | **  |
| siLacZ vs siErbB3                     | **  |
| siLacZ vs siErbB2                     | *** |
| siErbB3 vs siErbB2                    | *** |

Figure S3

|                | miR-19a | miR-148b | miR-149 | miR-155 | miR-204 | miR-302c | miR-326 | miR-520a-3p | miR-520d-3p |
|----------------|---------|----------|---------|---------|---------|----------|---------|-------------|-------------|
| <b>SOS1</b>    | X       | X        |         |         | X       | X        | X       | X           | X           |
| <b>RPS6KA5</b> | X       | X        |         |         | X       | X        |         | X           | X           |
| <b>PDE4D</b>   | X       | X        | X       | X       | X       | X        |         | X           | X           |
| <b>RAP1A</b>   | X       | X        | X       | X       |         | X        |         | X           | X           |
| <b>mTORC2</b>  | X       | X        |         | X       | X       |          | X       |             |             |
| <b>EGFR</b>    |         | X        | X       | X       | X       | X        |         | X           | X           |
| <b>APBB1IP</b> |         |          |         | X       | X       | X        | X       | X           | X           |
| <b>ADAM17</b>  |         | X        | X       |         | X       | X        | X       | X           | X           |
| <b>CPA3</b>    | X       | X        |         | X       |         | X        |         | X           | X           |
| <b>FRS2</b>    | X       | X        |         | X       | X       | X        |         | X           | X           |
| <b>CDKN1B</b>  |         | X        | X       | X       |         | X        |         | X           | X           |
| <b>CALD1</b>   | X       | X        | X       |         | X       | X        |         | X           | X           |
| <b>ERBB3</b>   | X       | X        | X       | X       | X       | X        | X       | X           | X           |
| <b>PIK3</b>    | X       | X        | X       | X       | X       | X        |         | X           | X           |

Figure S4

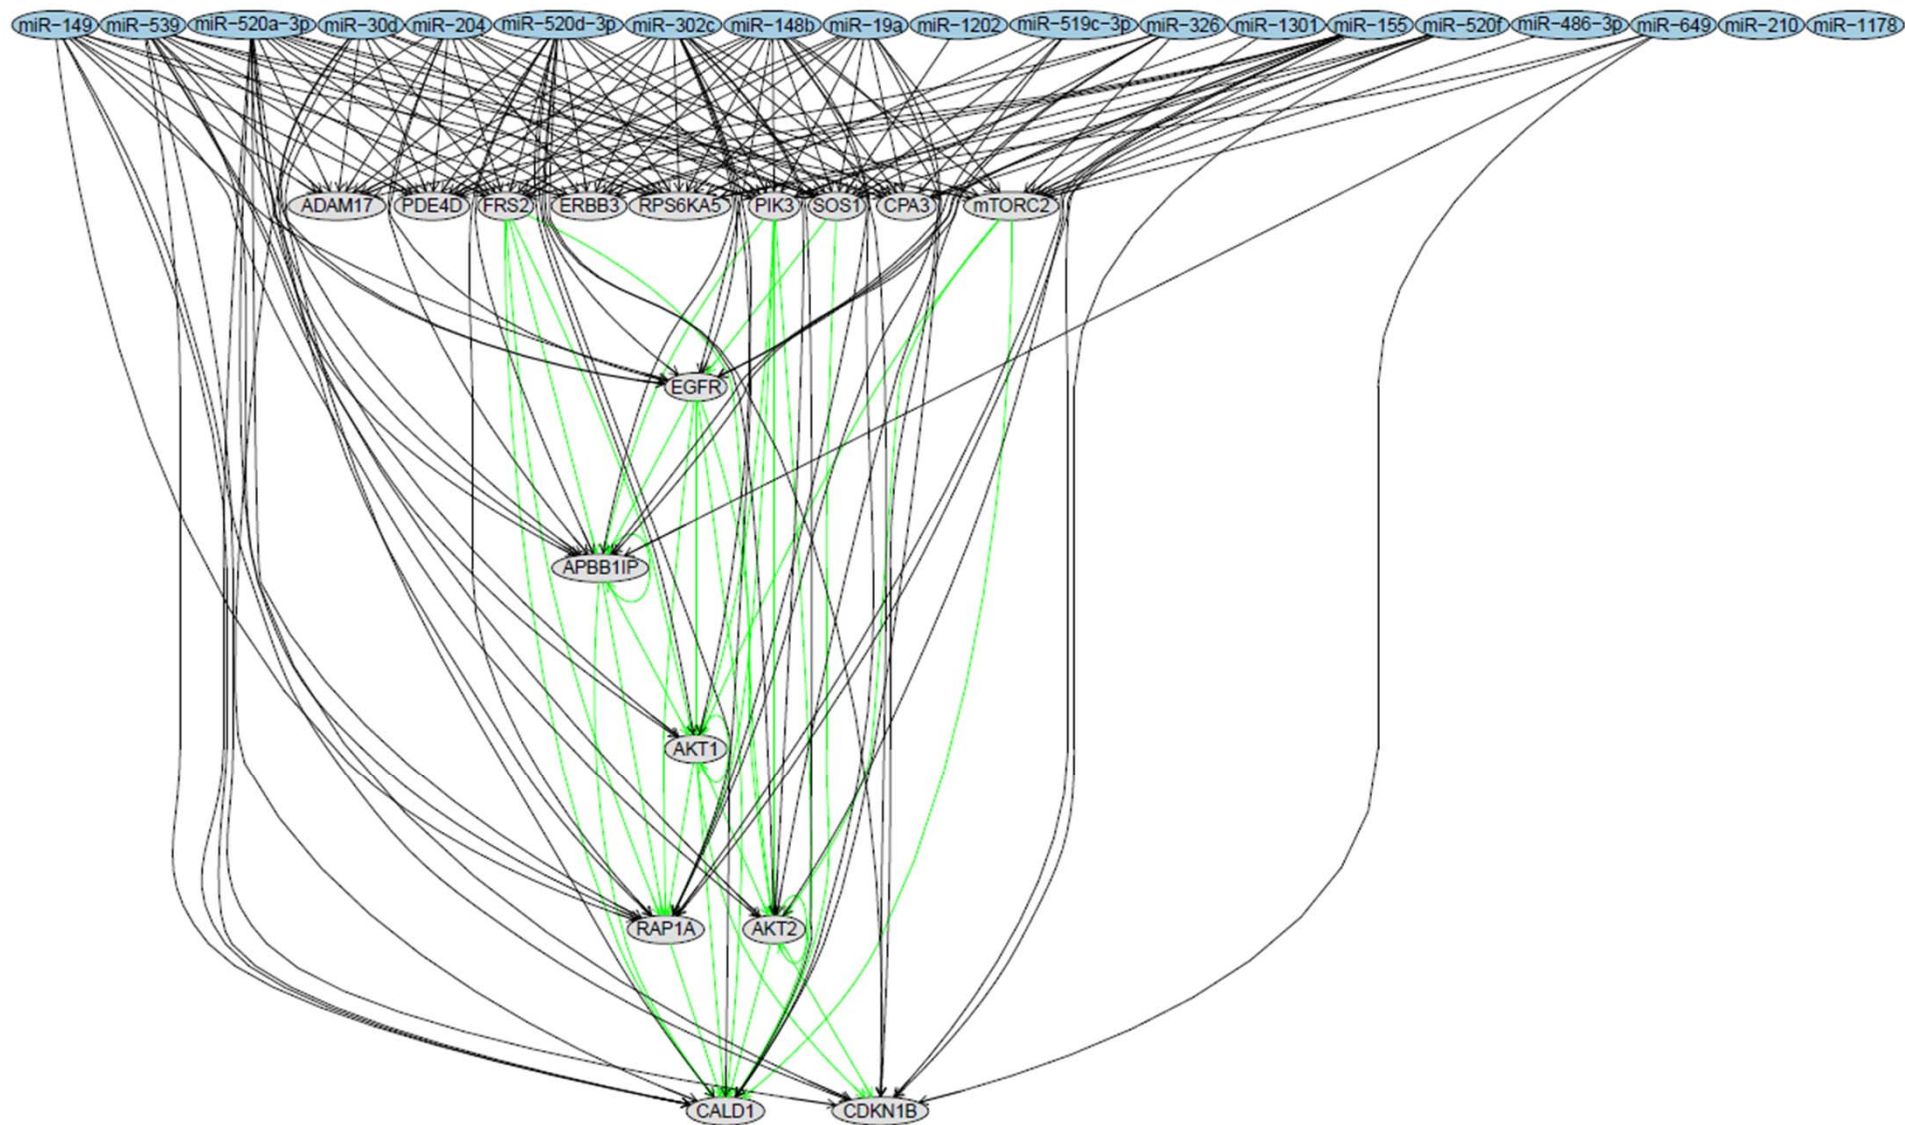

Figure S5

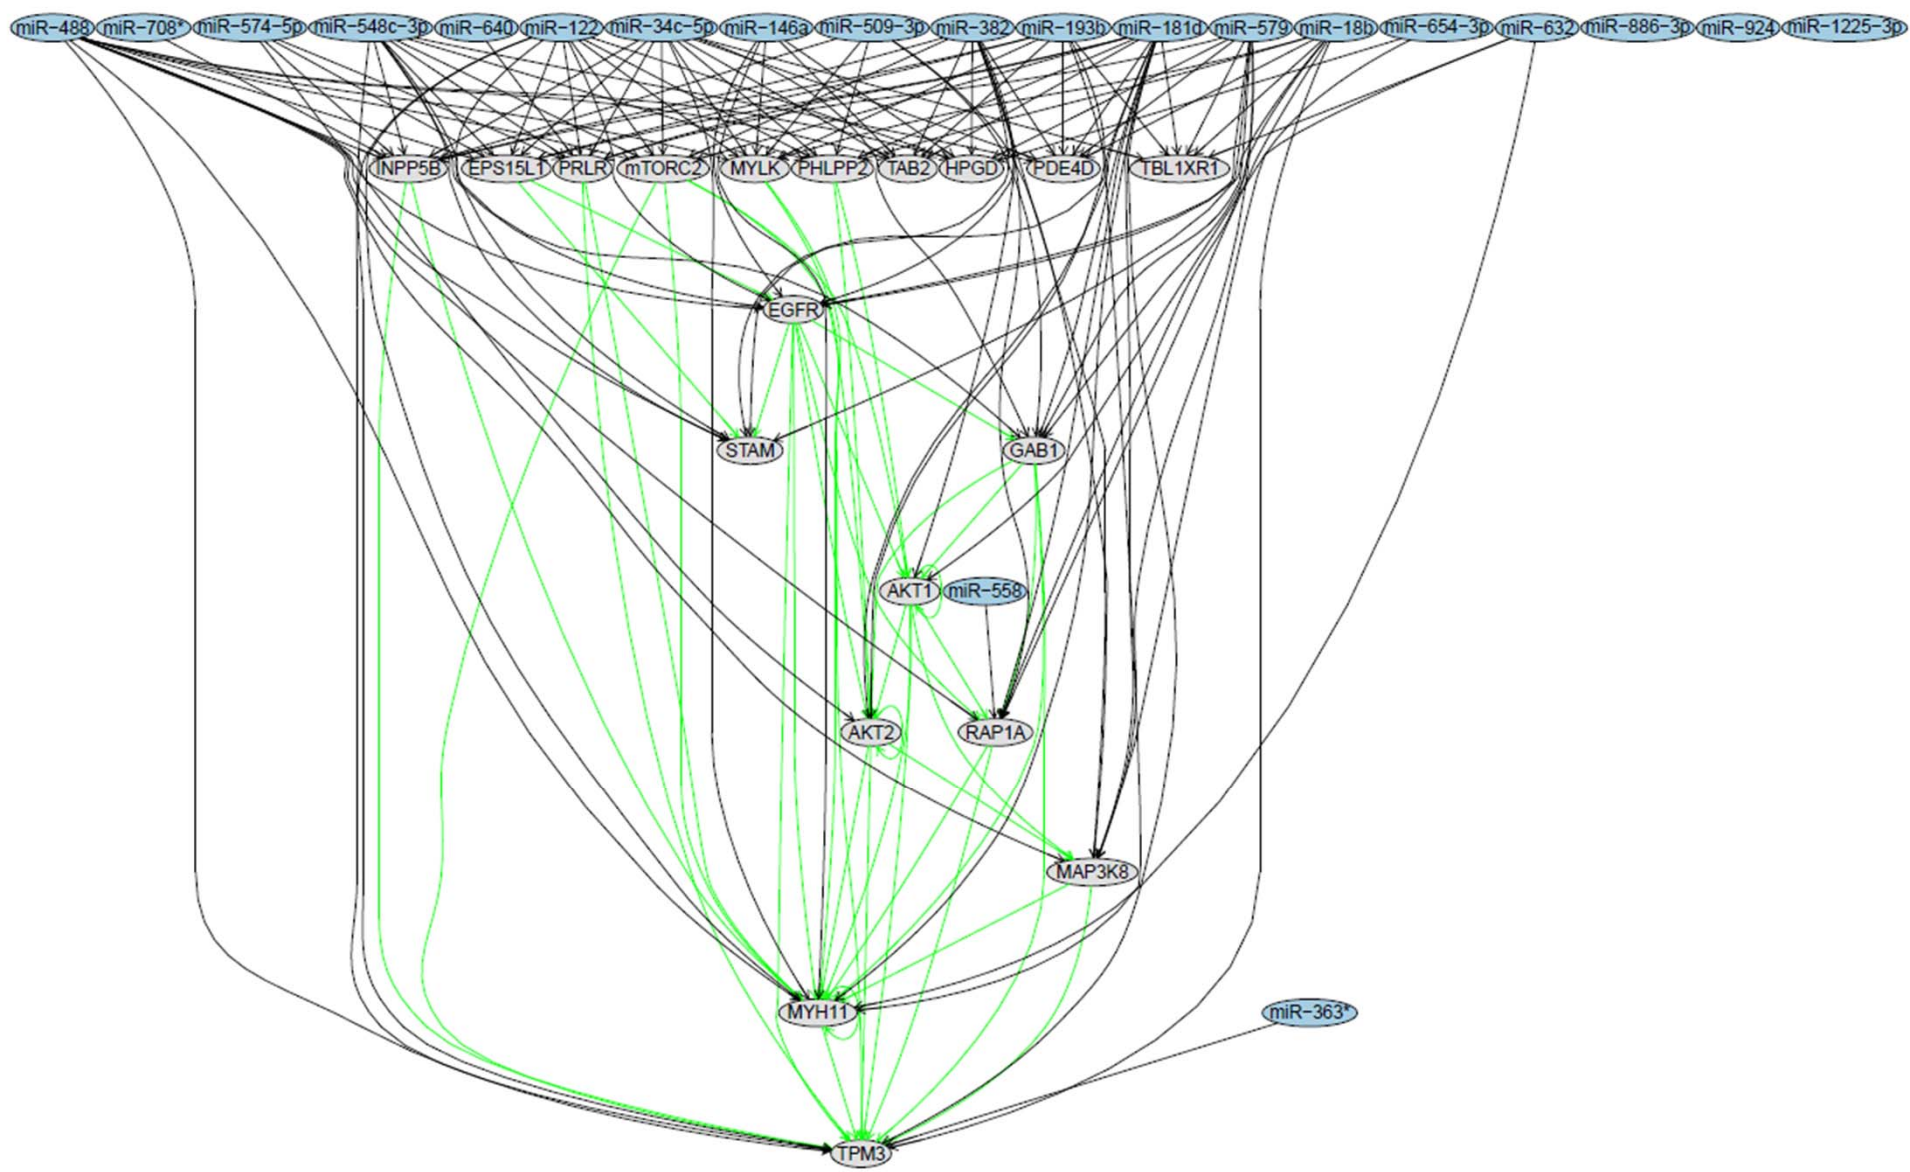



Figure S6

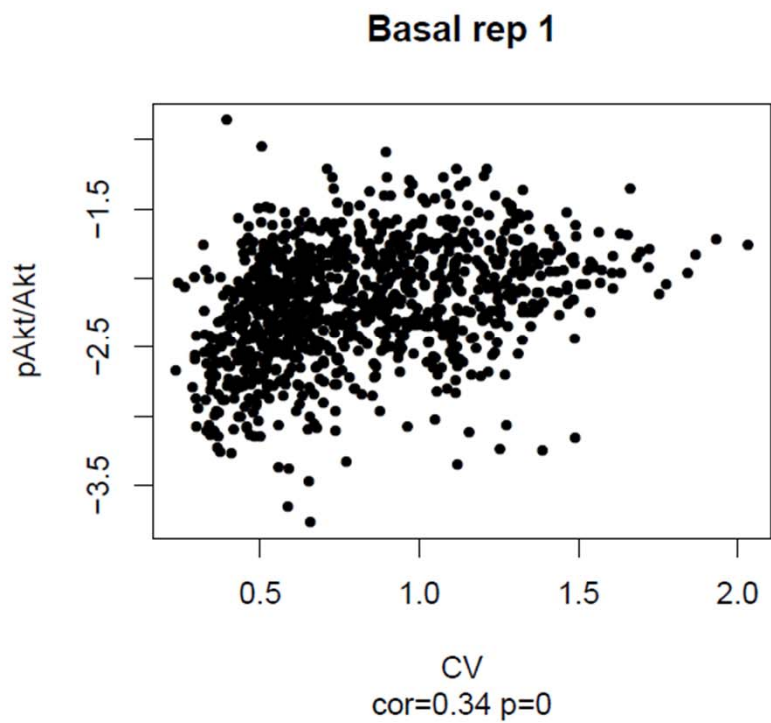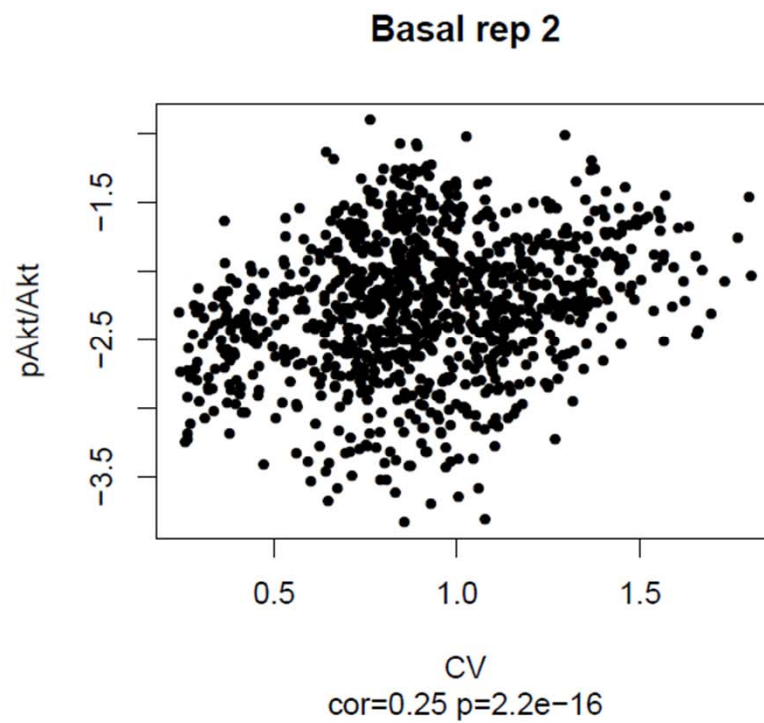

## Figure S7

### pGL3-ErbB3 3'UTR (Scott et al., 2007)

#### hsa-miR-520a-3p / ERBB3 alignment

```
3' ugucaggUUUCCCUUCGUGAAa 5' hsa-miR-520a-3p
      ||| | |||||
500: 5' uacuaUCAUAAUUCAGCACUa 3' ERBB3

3' ugucagguuucccuUCGUGAAa 5' hsa-miR-520a-3p
      |||||
650: 5' augccuguaaucucAGCACUu 3' ERBB3
```

### ErbB3 mRNA (NM\_001982)

#### hsa-miR-148b / ERBB3 alignment

```
3' uguuucAAG-AC-ACUACGUGACu 5' hsa-miR-148b
      ||| || | |||||
5366: 5' cacuguUUCUUGUUUUUGCACUGa 3' ERBB3
```

#### hsa-miR-326 / ERBB3 alignment

```
3' gaccUCC-UUCCCGGGUCUCc 5' hsa-miR-326
      ||| | |||||
4279: 5' cccaAGGCUAAUGCCCAGAGa 3' ERBB3
```

Figure S8

A

SKBR3

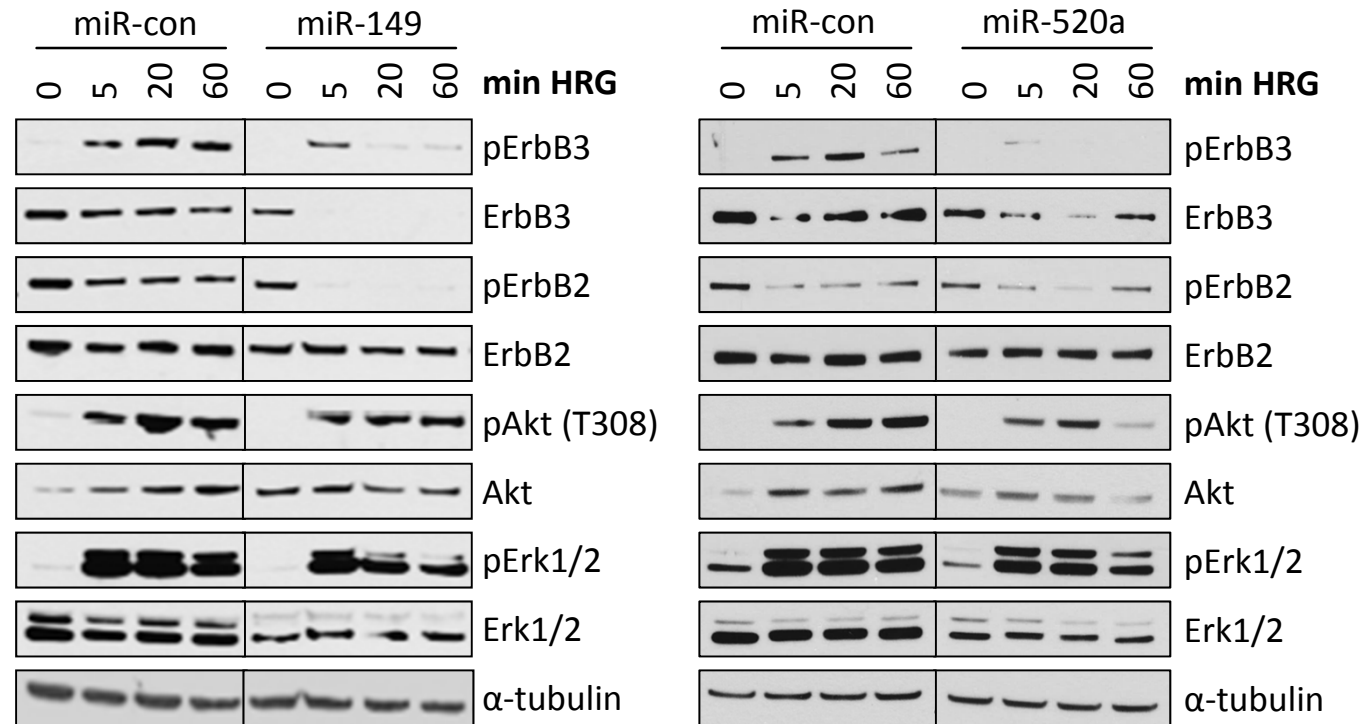

B

SKBR3

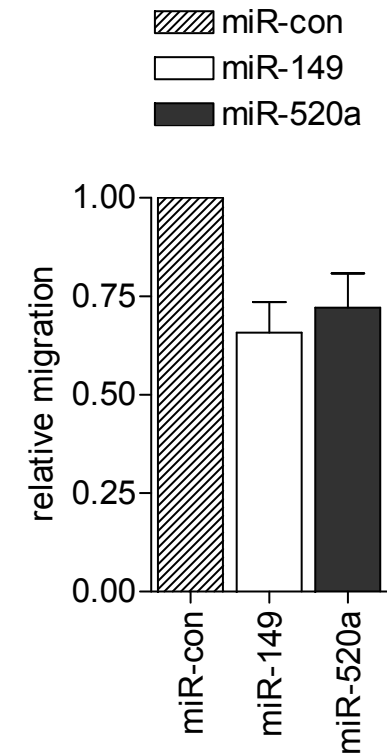

Supplement: 12964_2015_84_MOESM1_ESM.pdf [file 12964_2015_84_MOESM1_ESM.pdf]
